# Supplementary material for: Aqueous processable WO3−xnanocrystals with solution tunable localized surface plasmon resonance
Source: Royal Society of Chemistry journal article supplement (doi:10.1039/c6ra07938e), 2016-01-01
Supplement: c6ra07938e1.pdf [file c6ra07938e1.pdf]

## Supporting Information

# Aqueous Processable WO<sub>3-x</sub> Nanocrystals with Solution Tunable Localized Surface Plasmon Resonances

*Olexiy A. Balitskii*<sup>\*1</sup>, *Dariusz Moszyński*<sup>2</sup> and *Zareen Abbas*<sup>3</sup>

<sup>1</sup> Department of Electronics, Lviv Ivan Franko National University, Dragomanov str., 50, 79005, Lviv, Ukraine, email: balitskii@electronics.lnu.edu.ua

<sup>2</sup> Institute of Chemical and Environmental Engineering, West Pomeranian University of Technology in Szczecin, Pułaskiego 10, 70-310 Szczecin, Poland

<sup>3</sup> Department of Chemistry and Molecular Biology, University of Gothenburg, SE-4296, Gothenburg, Sweden

**\* Corresponding Author**

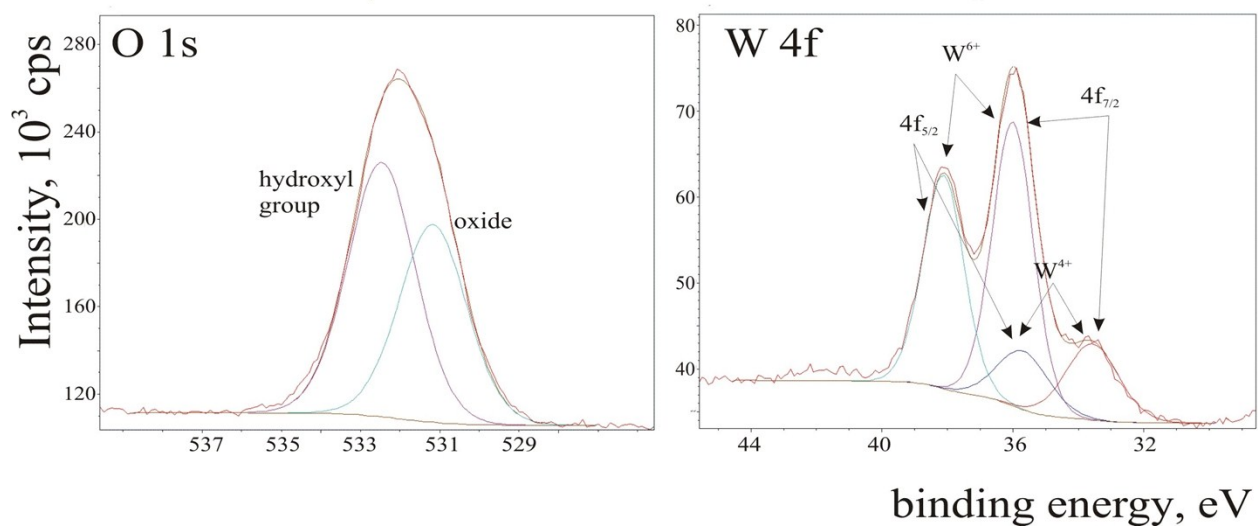

**Figure S1.** Detailed XPS scans of core O 1s and W 4f levels of the  $WO_{3-x}$  nanocrystals on a Si wafer.

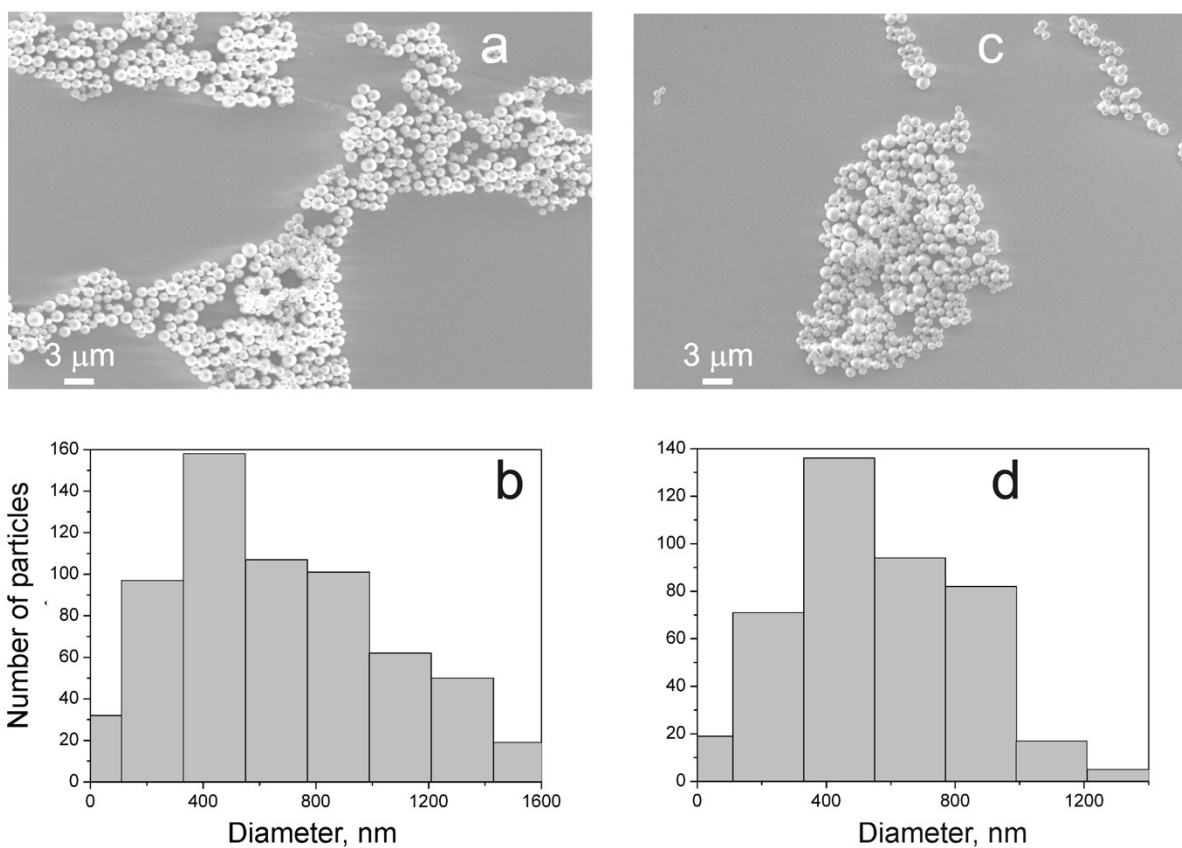

**Figure S2.** Representative SEM images and corresponding size histograms of the  $\text{WO}_{3-x}$  nanocrystals on a Si wafer deposited from water (a,b) and acidic solution (c,d) respectively.
